# Supplementary material
Source: publisher figshare collection journal article supplement (https://gsajournals.figshare.com/articles/dataset/_/8244758)
Supplement: Supplementary file 1 [file 2]

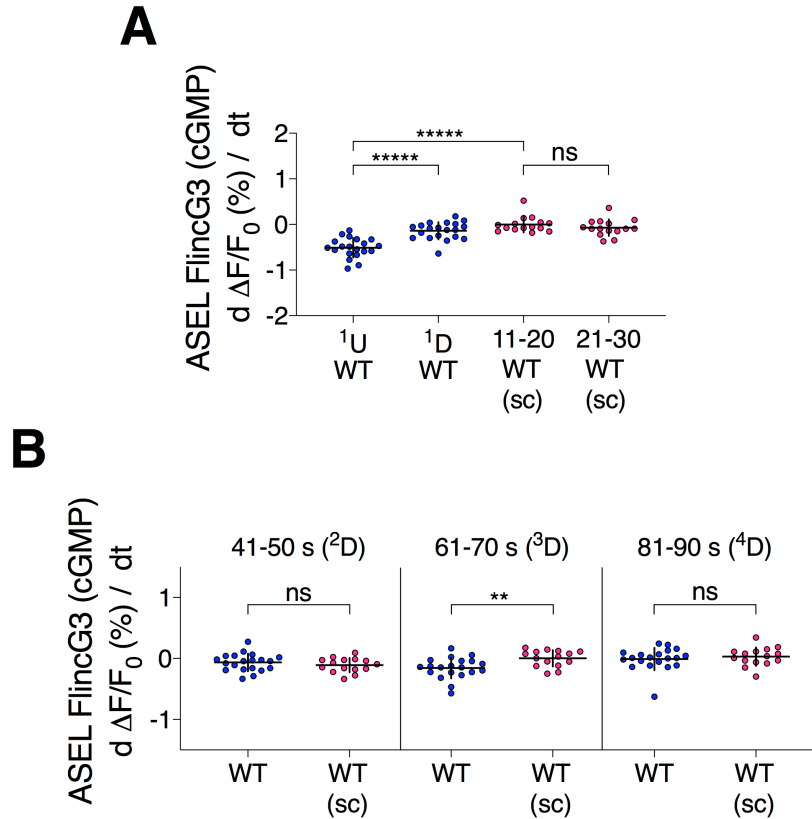

**Figure S6 The slope of FlincG3 fluorescence in the ASEL cell body changes in response to the first 0 to 50 mM NaCl upstep.**

(A) FlincG3 fluorescence in the ASEL cell body decreases in response to a 0 to 50 mM NaCl upstep and stops decreasing in response to a 50 to 0 mM NaCl downstep in wild-type animals. The slopes for the first 0 to 50 mM NaCl upstep between wild-type and wild-type switch control animals are different ( $n = 20$  (first set, blue; wild-type),  $n=15$  (third set, pink; switch control); permutation test  $p < 0.00001$ ). The slope values between the first 0 to 50 mM NaCl upstep and 50 to 0 mM NaCl downstep are different in wild-type animals ( $n=20$ ; first pair, blue; permutation test  $p < 0.00001$ ), as compared to those of the switch control, which are not different ( $n=15$ ; second pair, pink). Regression analysis was applied to the data for the first 0 to 50 mM NaCl upstep.  $R^2 = 1.00$  and  $R^2 = 0.01$  for wild-type and

wild-type switch control, respectively. Individual dots are the slopes calculated for each animal. sc = switch control. Horizontal bars indicate mean; vertical error bars indicate  $\pm$ SD. See Materials and Methods for details of statistical analysis. (B) FlincG3 fluorescence in the ASEL cell body does not change in response to the second and fourth 50 to 0 mM NaCl downstep and may decrease slightly in response to the third 50 to 0 mM NaCl downstep in wild-type animals relative to those exposed to the switch control. The slopes for the second and fourth 50 to 0 mM NaCl downstep between wild-type and wild-type switch control animals are not different (n = 20 (first set, blue; wild-type for second downstep and fifth set, blue; wild-type for fourth downstep), n=15 (second set, pink; switch control for second downstep and sixth set, pink; switch control for fourth downstep); permutation test ns). The slopes for the third 50 to 0 mM NaCl downstep between wild-type and wild-type switch control animals are different (n = 20 (third set, blue; wild-type), n=15 (fourth set, pink; switch control; permutation test  $p < 0.01$ ). Individual dots are the slopes calculated for each animal. sc = switch control. Horizontal bars indicate mean; vertical error bars indicate  $\pm$ SD. See Materials and Methods for details of statistical analysis.
