# Supplementary material
Source: publisher figshare collection journal article supplement (https://gsajournals.figshare.com/articles/dataset/_/8244758)
Supplement: Supplementary file 2 [file 2]

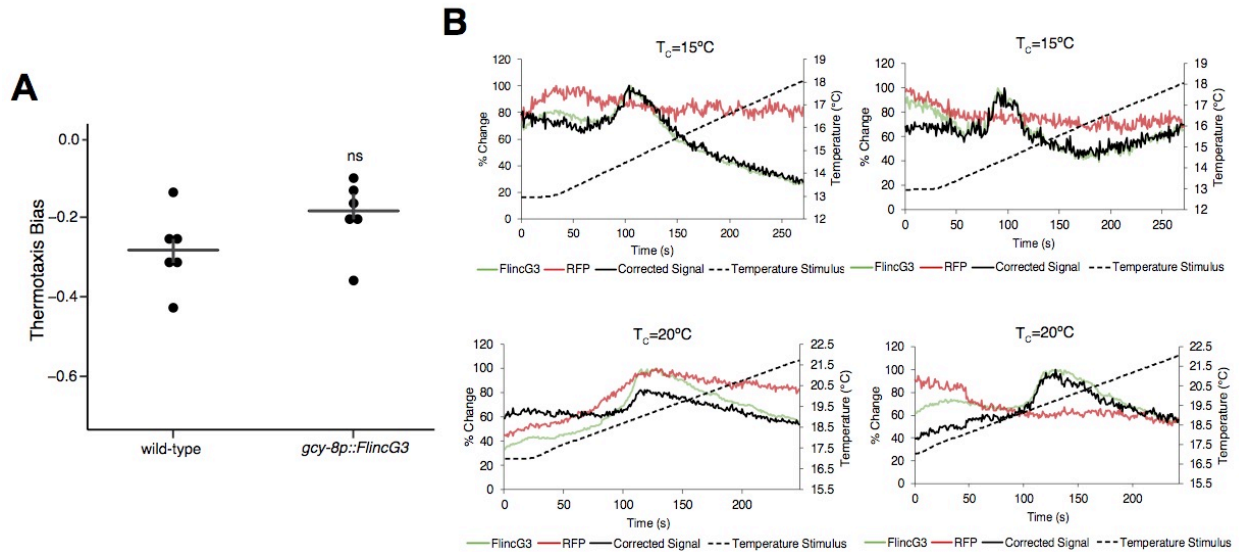

**Figure S3 Expression of FlincG3 in AFD does not alter thermosensory behavior.**

(A) Thermotaxis bias (see Materials and Methods) of control wild-type animals expressing or not expressing FlincG3 specifically in AFD under the *gcy-8* promoter (Yu *et al.* 1997). A negative number indicates negative thermotaxis. Control and FlincG3-expressing strains were examined together on multiple days.  $n=15$  animals each; 6 independent assays on 5 days. Each dot represents the thermotaxis bias from a single assay. Horizontal bars indicate mean thermotaxis bias, top and bottom of vertical bar indicates upper and lower quartile, respectively; ns = not significant (one-way ANOVA). (B) Example traces of changes in FlincG3 (green lines) and RFP (red lines) fluorescence measured simultaneously at the AFD neuronal tips in response to a rising temperature ramp (black dashed line). Black lines represent the corrected signal which was calculated

by dividing the FlincG3 fluorescence value by the RFP fluorescence value. Animals were grown at the indicated temperatures.
