# Supplementary material
Source: publisher figshare collection journal article supplement (https://gsajournals.figshare.com/articles/dataset/_/8244758)
Supplement: Supplementary file 3 [file 2]

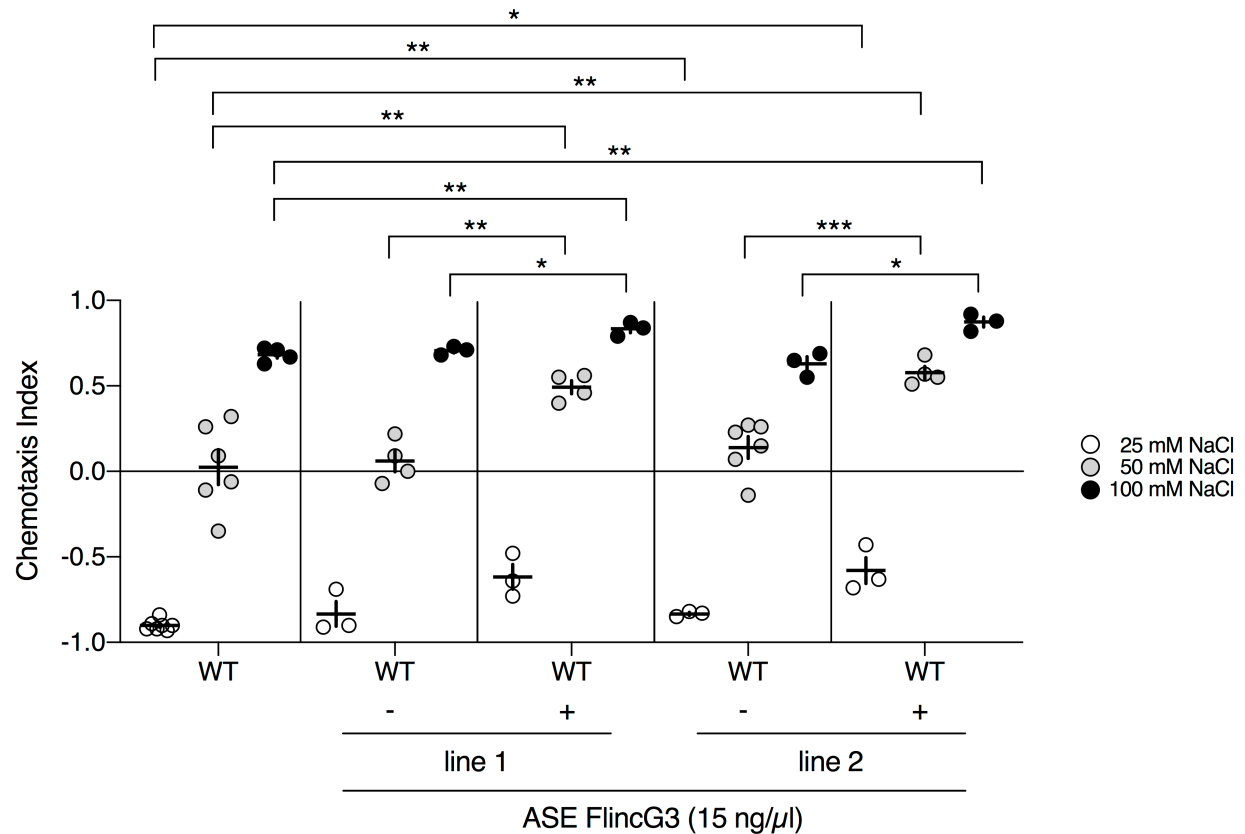

**Figure S7 Other lines generated from injecting 15 ng/ $\mu$ l *flp-6p::FlinG3* exhibit a preference for higher NaCl concentration while maintaining behavioral plasticity.**

This preference is significantly different from wild-type (WT) animals and nontransgenic siblings. Note that the wild-type data points are reproduced from Figure 6B. Individual dots represent a single trial. Horizontal bars indicate mean; vertical error bars indicate  $\pm$ SEM.
