# Supplementary material
Source: publisher figshare collection journal article supplement (https://gsajournals.figshare.com/articles/dataset/_/8244758)
Supplement: Supplementary file 4 [file 2]

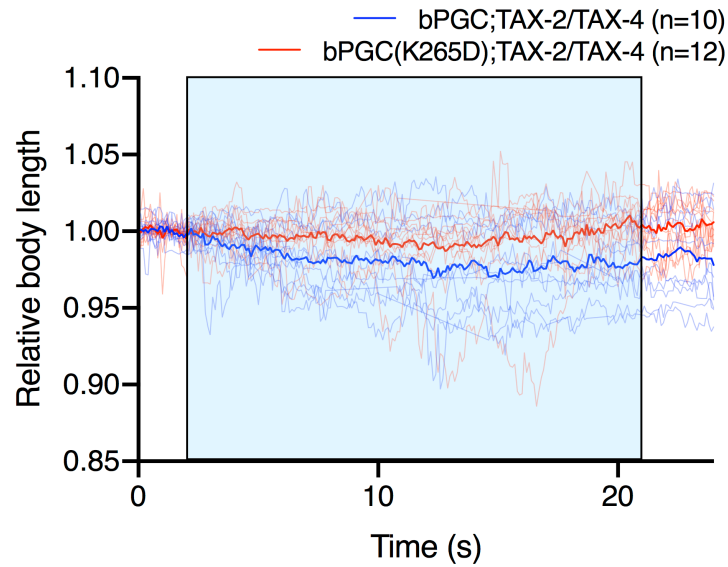

**Figure S1 Coexpression of bPGC with the cyclic nucleotide-gated cation channel TAX-2/TAX-4 in body wall muscle cells results in muscle contraction within one second upon exposure to blue light (n=10 animals).** bPGC(K265D) contains a point mutation that abolishes guanylyl cyclase activity. Animals coexpressing bPGC(K265D) with TAX-2/TAX-4 did not contract to the same extent (n=12 animals). Blue box denotes exposure to blue light.
