# Supplementary material
Source: publisher figshare collection journal article supplement (https://gsajournals.figshare.com/articles/dataset/_/8244758)
Supplement: Supplementary file 7 [file 2]

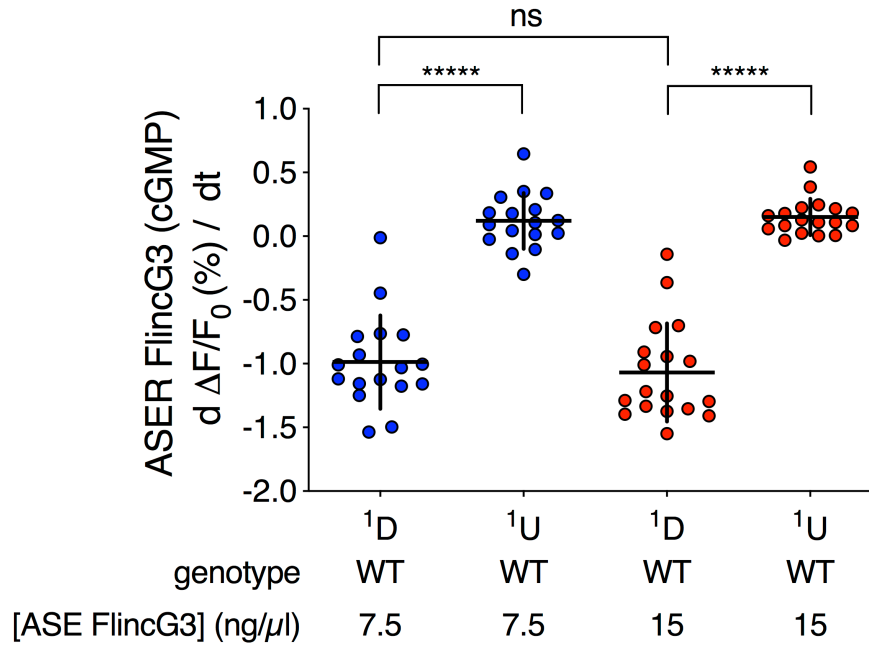

**Figure S8 ASER FlnG3 fluorescence changes are independent of tested reporter concentrations.** Regression analysis was applied to the data for the first 50 to 0 mM NaCl downstep.  $R^2 = 1.00$  and  $R^2 = 1.00$  for wild-type (WT) animals injected with 7.5 ng/μl and 15 ng/μl ASE FlnG3 (*flp-6p::FlnG3*), respectively. The slope values of the first 50 to 0 mM NaCl downstep and 0 to 50 mM NaCl upstep are different in wild-type animals injected with either 7.5 ng/μl (n=17; first pair, blue; permutation test  $p < 0.00001$ ) or 15 ng/μl (n=18; second pair, red; permutation test  $p < 0.00001$ ) ASE FlnG3. The data for the strain injected with 7.5 ng/μl ASE FlnG3 are the same as the data used in Figure S5A as wild-type, first pair, blue. The slopes for the first 50 to 0 mM NaCl downstep in wild-type animals injected with 7.5 ng/μl and 15 ng/μl *flp-6p::FlnG3* are not different (n=17; (first set, blue; 7.5 ng/μl), n=18 (third set, red; 15 ng/μl); permutation test ns). Individual dots are the slopes calculated for each animal. Horizontal bars indicate mean; vertical error bars indicate  $\pm$ SD. See Materials and Methods for details of statistical analysis.
