# Supplementary material
Source: publisher figshare collection journal article supplement (https://gsajournals.figshare.com/articles/dataset/_/8244758)
Supplement: Supplementary file 8 [file 2]

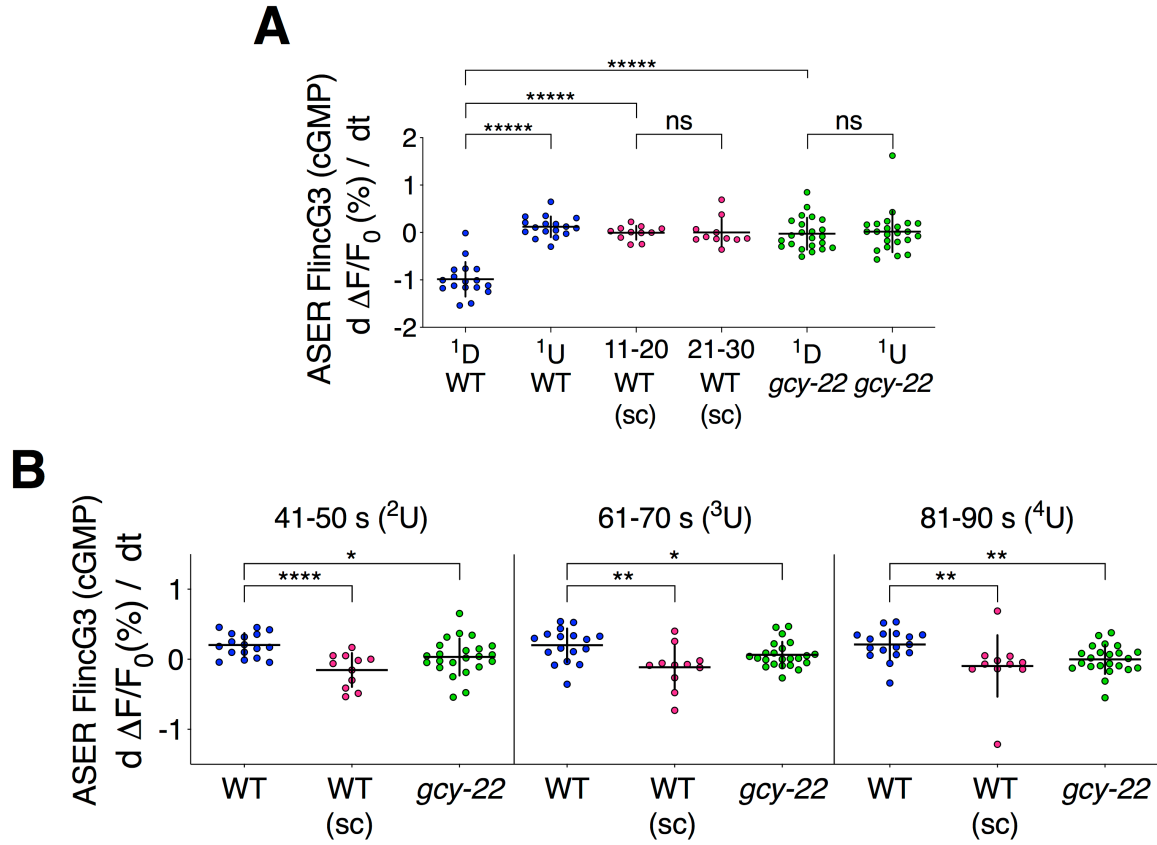

**Figure S5 The slope of FlnG3 fluorescence in the ASER cell body changes in response to 50 mM NaCl step changes and depends on the receptor guanylyl cyclase GCY-22.**

(A) FlnG3 fluorescence in the ASER cell body decreases in response to a 50 to 0 mM NaCl downstep and stops decreasing in response to a 0 to 50 mM NaCl upstep in wild-type animals. The slopes of FlnG3 fluorescence for the first 50 to 0 mM NaCl downstep between wild-type and *gcy-22(tm2364)* animals are different ( $n=17$  (first set, blue; wild-type),  $n=23$  (fifth set, green; *gcy-22*); permutation test  $p<0.00001$ ). In wild-type animals, the slopes in response to the first 50 to 0 mM NaCl downstep are also different from those exposed to the switch control ( $n=17$  (first set, blue; wild-type),  $n=11$  (third set, pink; switch

control); permutation test  $p < 0.00001$ ). The slopes of the first 50 to 0 mM NaCl downstep and 0 to 50 mM NaCl upstep are different in wild-type animals ( $n=17$ ; first pair, blue; permutation test  $p < 0.00001$ ). By contrast, the slopes of the first 50 to 0 mM NaCl downstep and 0 to 50 mM NaCl upstep are not different in wild-type animals exposed to switch control and *gcy-22* animals ( $n=11$ ; second pair, pink and  $n=23$ ; third pair, green, respectively). Regression analysis was applied to the data for the first 50 to 0 mM NaCl downstep.  $R^2 = 0.99$ ,  $R^2 = 0.04$  and  $R^2 = 0.15$  for wild-type, *gcy-22 (tm2364)* and wild-type switch control, respectively. Individual dots are the slopes calculated for each animal. sc = switch control. Horizontal bars indicate mean; vertical error bars indicate  $\pm$ SD. See Materials and Methods for details of statistical analysis. (B) FlincG3 fluorescence in the ASER cell body increases in response to the second, third and fourth 0 to 50mM NaCl upstep in wild-type animals. The slopes for the second 0 to 50 mM NaCl upstep between wild-type and *gcy-22(tm2364)* animals are different ( $n=17$  (first set, blue; wild-type),  $n=23$  (third set, green; *gcy-22*); permutation test  $p < 0.05$ ). In wild-type animals, the slopes in response to the second 0 to 50 mM NaCl upstep are also different from those of the switch control ( $n=17$  (first set, blue; wild-type),  $n=11$  (second set, pink; switch control); permutation test  $p < 0.0001$ ). The difference in slopes for the third and fourth 0 to 50 mM NaCl upstep between wild-type and *gcy-22(tm2364)* animals is also significant ( $n = 17$  (fourth set, blue; wild-type for third upstep and seventh set, blue; wild-type for fourth upstep),  $n=23$  (sixth set, green; *gcy-22* for third upstep and ninth set, green; *gcy-22* for fourth upstep); permutation test  $p < 0.05$  for third upstep and  $p < 0.01$  for fourth upstep). In wild-type animals, the slope values in response to the third and fourth 0 to 50 mM NaCl

upstep are also different from those of the switch control (n=17 (fourth set, blue; wild-type for third upstep and seventh set, blue; wild-type for fourth upstep), n=11 (fifth set, pink; switch control for third upstep and eighth set, pink; switch control for fourth upstep); permutation test  $p < 0.01$ ). Individual dots are the slopes calculated for each animal. sc = switch control. Horizontal bars indicate mean; vertical error bars indicate  $\pm$ SD. See Materials and Methods for details of statistical analysis.
