# Supplementary material
Source: publisher figshare collection journal article supplement (https://gsajournals.figshare.com/articles/dataset/_/8244758)
Supplement: Supplementary file 10 [file 2]

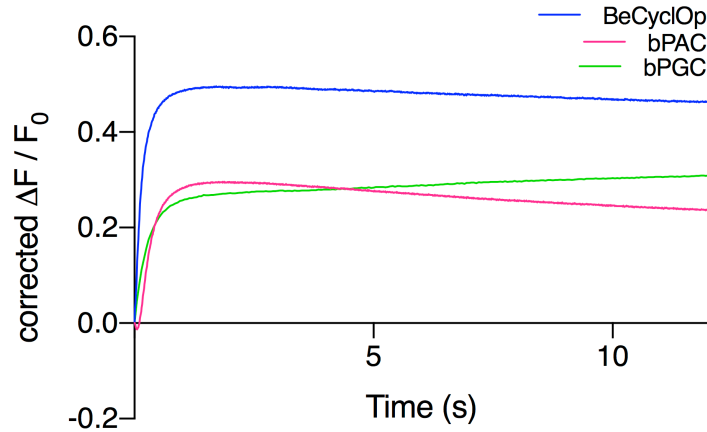

**Figure S2 Normalized BeCyclOp, bPGC and bPAC traces suggest that FlincG3 responds to cAMP.**  $\Delta F/F_0$  from BeCyclOp trace with no ATR (Figure 2B, bottom blue trace) was subtracted from the  $\Delta F/F_0$  of the BeCyclOp trace with ATR (Figure 2B, top green trace), bPGC (Figure 2D) and bPAC (Figure 2F) to generate the average corrected  $\Delta F/F_0$  traces. Blue, pink and green traces correspond to average corrected BeCyclOp, bPAC and bPGC traces, respectively.
